# Supplementary material for: Broadband solar absorption with silicon metamaterials driven by strong proximity effects
Source: Royal Society of Chemistry journal article supplement (doi:10.1039/c9na00711c), 2020-01-01

# Broadband solar absorption with silicon metamaterials driven by strong proximity effects

Ankit Chauhan<sup>1</sup>, and Gil Shalev<sup>1,2\*</sup>

<sup>1</sup> School of Electrical & Computer Engineering, Ben-Gurion University of the Negev, POB 653, Beer-Sheva 8410501, Israel

<sup>2</sup> The Ilse-Katz Institute for Nanoscale Science & Technology, Ben-Gurion University of the Negev, POB 653, Beer-Sheva 8410501, Israel.

\*E-mail: glshalev@bgu.ac.il

## Supplementary information

**Figure 1**

**Peak 2:  $\lambda=500$  nm (maximum  $Q_{abs}$  for  $P=1\ \mu\text{m}$ )**

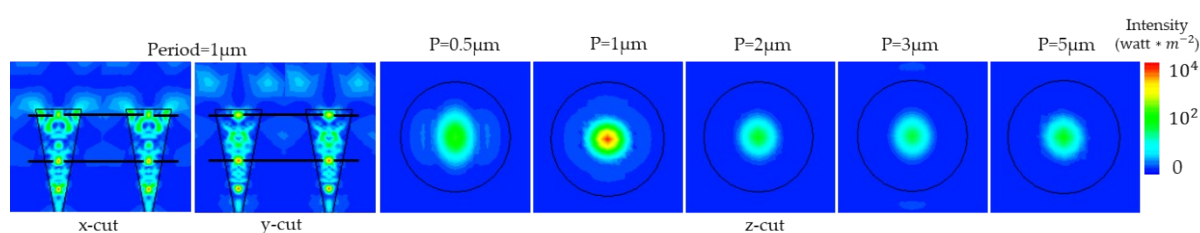

**Peak 3:  $\lambda=540$  nm (maximum  $Q_{abs}$  for  $P=0.5\ \mu\text{m}$ )**

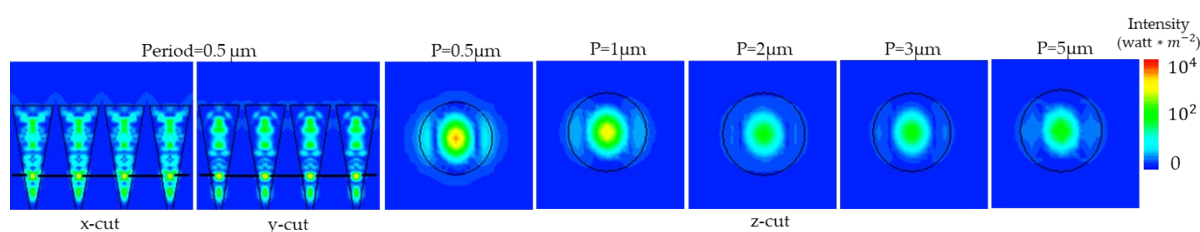

**Peak 6:  $\lambda=740$  nm (maximum  $Q_{abs}$  for  $P=2\ \mu\text{m}$ )**

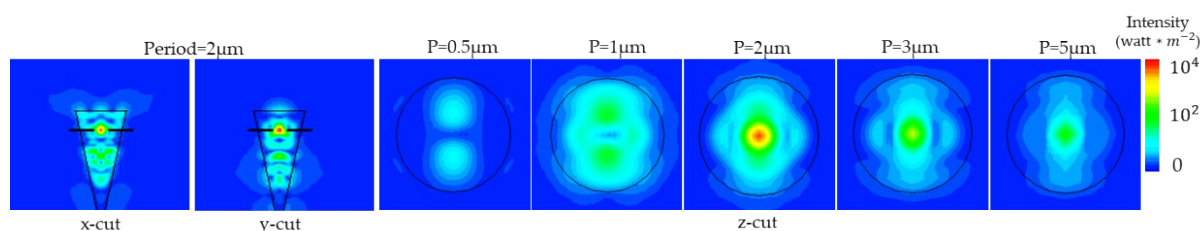

**Peak 7:  $\lambda=820$  nm (maximum  $Q_{abs}$  for  $P=1\ \mu\text{m}$ )**

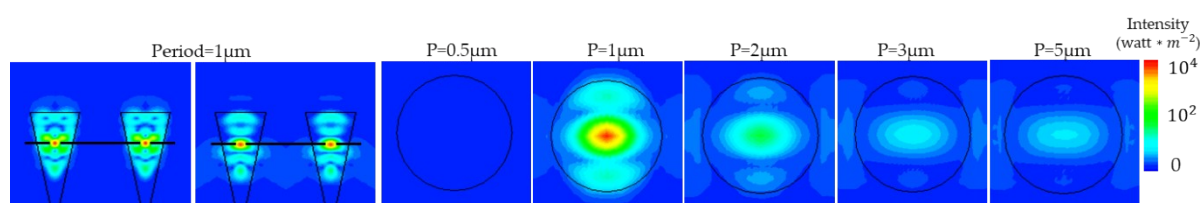

**Peak 8:  $\lambda=980$  nm (maximum  $Q_{abs}$  for  $P=0.5 \mu\text{m}$ )**

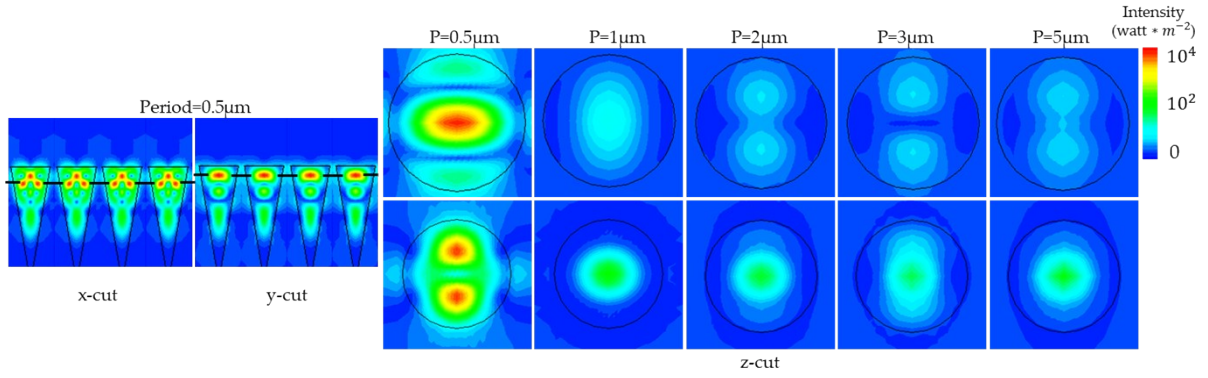

**Figure 2**

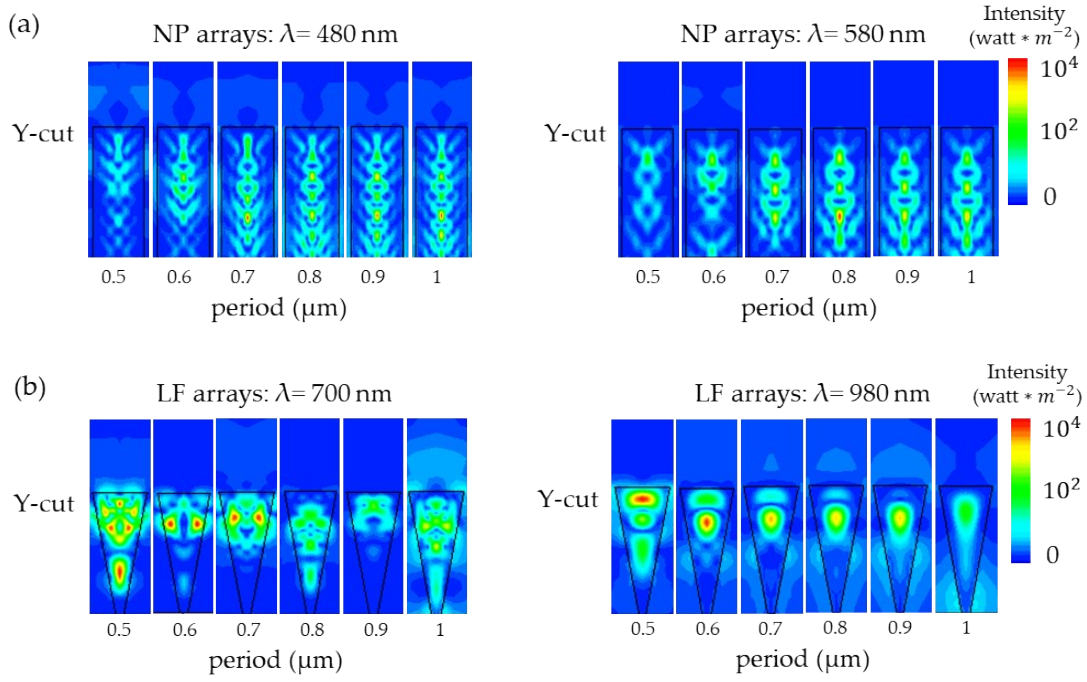

Supplement: c9na00711c1.pdf [file c9na00711c1.pdf]
